# Supplementary material for: In Silico Identification and Characterization of Satellite DNAs in 23 Drosophila Species from the Montium Group
Source: MDPI journal article supplement (doi:10.3390/genes14020300), 2023-01-23
Supplement: s1 [file s1]

## File S1. Satellite DNA consensus sequences of 101 satellite DNAs identified in species from the *montium* group.

### >dmgsat-1\_D.asahinai

GAAAATACACGGCTTTTGGCTATCACTTCCTTTTTGGCTATAAGAGGCTCTTAAGAAGACCTTACTTTCTCACATTTTTTTGAATCAAAAAATGTTTCGAAAAATATGATTTTTTT  
TTTTAATAATCTAGTATAAAAAACCTTCAAACTATGCCAAAACAGCCTTAATTTCAATTTGGAAAGCTTTTCTGTGTCAGTTTTTTATTAGATTAATAAATCTGCTTATTAAGAT  
TAGAAATTTAAACAAATAATTTTTTTGCGATGTTTTGAAAAAACTAAGTTTCCCCCTTATCAAATTTTGAAAAATCGATAAAAAAATGTTTTCTGATATTTTTCAATATTTTGG  
TTTTAAGTGTTTACAATTTTAACGACGAATCG

### >dmgsat-1\_D.rufa

GAAAATACACGGCTTTTGGCTATCACTTCCTTTTTGGCTATAAGAGGCTCTTAAGAAGACCGTACTTTTGATTCAAAAAATGTGTGCGAAAAATGTTTTTTTTTTTTTTGGGAA  
ATCTAAGATAAAAAACCTTCATACTAAGCCAAAACAGCCTTAATTTCAATTCGGAAAGCTTTTCTGTGTCAGTTTTTTATTAGATTAATAAATCTGCTTATTAAGATTAGAAATT  
TAAGCAAATAAATTTTTCGTGATTTTTTGAAAAAATACTGCCATCCCCCTTATCACATTTTGAAAAATCGATAAAAAAATTTTTCTGATATTTTTCAATATTTTGGTTTTAA  
GTGTTTACAATTTTAACGACGAATCG

### >dmgsat-1\_D.lacteicornis

GAACATACACGGCTTTTGGCTATCACTTCCTTTTTGGCTATAAGAGGCTCTTAGGAAGATTTTACTTTTCCACATTTTTTTGAATCAAAAAATGTTTCGAAAAATATGATTTTTTT  
TTTTAATAATCTAGGATAAAAAACCTTCAAACTATGCCAAAACAGCCTTAATTTCAATTCGGAAAGCTTTTCTGTGTCAGTTTTTTATTAGATTAATAAATCTGCTTATTAAGAT  
TAGAAATTTAAACAAATAATTTTTTTGCGATTTTTTGAAAAAACTAAGTTTCCCCCTTATCAAATTTTGAAAAATCGATAAAAAAATGTTTTCTGATATTTTTCAATATTTTGG  
TTTTAAGTGTTTACAATTTTAACGACGAATCG

### >dmgsat-1\_D.tani

GAAAATACACGGCTTTTGGCTATCACTCGCTTTTTGGCTATAAGAGGCTCTTAAGAAGACCTCAAATTTTTCACATTTTTTGGGTAAAAAATAAAATTCCAAATATATGATTTTTTT  
TTGAAAAATCTAAGATAAAAAATTACCATAACTAAGTCAAAACAGCCTTAAATTTCAATTCGGGAAGCTGTTCTATGTTAGATTTTATTAGCTTATAAATCTGCTTATTTAGTTT  
AGAATTCCTTGACAATTAAATTTTTTGCCAATTTTCGACATTTTAAATGATGAAAGTTATGAAAATTTTGAAAAATCGATCAAAATTTTTTTTCTGGAATTTTTTAATATTTTGG  
CTTTAAGTGTTTACAATTTTAACGACGAATCC

### >dmgsat-1\_D.auraria

GAAAATACACGCCTTTTTGCTATCACTCCCTTTTTGCCTATAGGAGGAGCTGAAGAAGACCTTAAATTTTCAAATATTTTTATTTTTTAAATATGATAATTTTTTGAAAAAA  
CTTAGACAAAAATAGTCATACTAAGCTAAAACAGCCTTAATTTCAATTTGGAAAGCTGTTCTATGTTAGGTTTTATGAAAATAATAAATCTGCATACTCAGTTTAAAAATTTA  
AACAAATAAATTTTATGCCAATTTTTGAACATTTTAACGACCCCCGACCTTCTAACATTTTAAAAAATCAAAAAAAAATTTTTCTGATATTTTTCAATATTTTGGTTTTAAAT  
TGTTTGTAATTTTAATGACGAATCC

### >dmgsat-1\_D.triauraria

GAAAATACACGCCTTTTTGCTATCACTCCCTTTTTGCCTATAGGAGGAGCTGAAGAAGACCTTAAATTTTCAAATATTTTTATTTTTTAAATATGATAATTTTTTGAAAAAA  
CTTAGACAAAAATAGTCATACTAAGCTAAAACAGCCTTAATTTCAATTTGGAAAGCTGTTCTATGTTAGGTTTTATGAAAATAATAAATCTGCATACTCAGTTTAAAAATTTA  
AACAAATAAATTTTATGCCAATTTTTGAACATTTTAACGACCCCCGACCTTCTAACATTTTAAAAAATCAAAAAAAAATTTTTCTGATATTTTTCAATATTTTGGTTTTAAAT  
GTTTGTAATTTTAATGACGAATCC

### >dmgsat-2\_D.asahinai

TTCTGCCCATAACTTCTAAACGACTTAAGCTACAGAAATGATGTAAGTACTGTTGTCTTCTGGCGTTAAATACGCAGCCAACGACACCACATTCATCCCGATCGGATGCTCCGT  
TGAAAAGATATTCAATAAAGATGATTTTACCGTTGTTTTTTTTTGTGTTA

### >dmgsat-2\_D.rufa

TTCTGCCCATAACTTCTAAACGACTTAAGCTACAGAAATGATGTAAGTACTGTTGTCTTCTGGCGTTAAATACGCAGCCAACGATACCACATTCATCCCGATCTGATGCTCCGT  
TGAAAAGATATTCAATAAAGATGATTTTACCGTTGTTTTTTTTTGTGTTA

### >dmgsat-2\_D.lacteicornis

TTCTGCCCATAACTTCTAAACGACTTAAGCTACAGAAATGATGTAAGTACTGTTGTCTTCTGGCGTTAAATACGCAGCCAACGACACCACATTCATCCCGATCGGATGCTCCGT  
TGAAAAGATATTCAATAAAGATGATTTTACCGTGTTTTTTTTTGTGTTA

### >dmgsat-2\_D.tani

TTCTGCCCATAACTTCTAAACGGCTTAAGCTACAGAAATAATGTAAGTACTGTTGTCTTCTGCCGTTAAATACGCAGCCAACGACACCACATTCATCCCGATCTGATGCTCCGT  
TGAAAAGATATTCAATAAAGAATAGATATAGATAGTTAAAAAATATGATTTTTTTTCGATGTTTTTTTTTGTGTTA

```
>dmgsat-2_D.auraria
TTCTGCCCATAACTTCTAAACGGCTTAAGTTACAGAAACAGTTTAAATGTTGTTTTGCTCTAGTTTTGAGTACGCGTCGAACAATACCTCAATCATCCCGATCAGATACTCTGT
TAAAAAAAATACTCAACAAAGAAGTTTTTACAGTTTAATTTTTTTTTTAATTAC
>dmgsat-2_D.triauraria
TTCTGCCCATAACTTCTAAACGGCTTAAGTTACAGAAACAGTTTAAATGTTGTTTTGCTCTAGTTTTGAGTACGCGTCGAACAATACCTCAATCATCTCGATCAGATACTCTGT
TGAAAAGATATTCAACAAAGAAGTTTTTACAGTTTAATTTTTTTTTTAATTAC
>dmgsat-3_D.asahinai
TTTTTTTCATGCATGAA
>dmgsat-3_D.rufa
TTTTTTTCATGCATGAA
>dmgsat-3_D.lacteicornis
TTTTTTTCATCGATGAA
>dmgsat-4_D.punjabiensis
AAAAATATATCAAAATATAT
>dmgsat-4_D.watanabei
AAAAATATATAAAAACATGC
>dmgsat-5_D.mayri
TTTTTAGAGTTTCTGGATGGAATTTTTGAGTTTTAAGGGGTTTTAAGGGGGCAAACGTTTGTTATTTTTGTTTTAAGAGTTATTTGATGAAATTGTTTAGTTTTAAGGGGTGGGC
ATTTTAGATTTTGTAGTTTTAAGAGATGGGCAGAAGTTTTTTCTTAAATTTTTTAGTTTTAAGGATTTTTTTTTAT
>dmgsat-5_D.birchii
TTTTTAGTATTTCTCGATGAAAATGTTTAGTTTTAAAGGTGGGCATTTTATATTTTGTAGTTTTAAGAGATGGGCAGAAGTTTTTTTTTTTTAATTTTTTAGTTTTAAGGATT
TTTTTAT
>dmgsat-6_D.serrata
GTCAGAAGTGTCAGTTTCAGATGTGTCAGT
>dmgsat-6_D.bunnanda
GACACTTCTGTCACTGACACTTTTGGCACTGACACTTCTGACACTGACACTTTCACTACTGACACT
>dmgsat-7_D.mayri
ATATTATTCTGAATTTTCGGTTTTAATTTTCATGAAAATCGGCCTACTATATCCTATAGCTTCCATAGGAACAATCAGGAAAATAAAAGAAAACCCCATAAATTTTGTCTAGTTTTT
AACATATTTTCATCAAAGTTGAGATTTAGCCGTTTT
>dmgsat-7_D.serrata
ATATTACTCTACAATTTTGTGTAAAATTTTATGAAAATCGGACTACTATATCATATAGCTCCCATAGGAACGATCGAGAAATTAATACAATTAAAAATTATAACTTTTTTCAGTT
TTCAACAGAATTTTCATCAAATTTGAGATATAGCCATTTT
>dmgsat-8_variant_1_D.truncata
AACATGAAAATCGAAGTTTGGGAATGCCATAAATTGGCCAAAAATCCATCAATTTCAATTTCTGGAAGCACAGAAGTGTTTGTTTTTATTAGCTTAACAACACTGCAAACCAAAT
TTATTAAATTTCCATAGTTTTCAGATTTTTTCGAATTTTTTCACAATTTTGACGACCCCCACCCTTATCTTTTTTTTGGGAATAATGGC
>dmgsat-8_variant_2_D.truncata
AACAAAAAATCGAAGTTGGGAATACCATAAATTGGCCAAAAATCTATCAATTTTAAATCTGAGAGCACAAACAGTATTATTTTTATTAGCTTAACAAACCAGCAAACCCAATTA
AATAATTTTCATTAATATCAAAGATTTTGAATTTTTTCACAATTTTCACGACCCCTTATCATTTTCGAAAAAAAACATC
>dmgsat-8_D.birchii
ATCATGAAAATCAAAATTTTGAATGCCATAAATTGGCTTTAAATAAACTAATTTTAAATCTGTAAGCACAGAAGTGCTTGTTTTTGTAGCTCTACAAAGCTGCAAACCTAAA
TTTATCAATTTATTTAAATTAAAAAATTTGAATTTTTTAAATGGGGTACCCCTTATCTTAAAAAATAA
>dmgsat-9_D.birchii
GAATAAGAATAAGAATAAGAATAA
>dmgsat-9_D.bunnanda
```

GAATAAGAATAAGAATAAGAATAA

>dmgsat-10\_D.bocki

AAAAAAGAAGGAGTAGAAGACTAAATAACGAAGAAGAAGGC

>dmgsat-10\_D.leontia

AAAAAAGAAGGAGTAGAAGACTAAATAACGAAGAAGAAGGC

>dmgsat-11\_D.bocki

TGTAAAACTAATATAAATACAAATTCTGAAGTGGATACATGCATTATTAGCTGAGTTGTGAACTTTTTGTTTACAAATTTACAATTGAGTATGCAAATGTATTAGCCT

>dmgsat-11\_D.leontia

TGTAAAACTAATATAAATACAAATTCTGAAGTGGATACATGCATTATTAGCTGAGTTGTGAACTTTTTGTTTACAAATTTACAATTGAGTATGCAAATGTATTAGCCA

>dmgsat-12\_D.bocki

TGGTGTCTGCCAGCGGCATTTTCGGCTGCAGAGTCCTCGTCGGTCGTCGATAAGGGAGGACGGCTCGTCGACGGCCCTTCAGGTCGGCGTCGGGCGACGACGGCTGCGTAACC  
TCCGGGCGGCTAGGTGTCTGTGCCGGTGACACCTCGGCTGCAGCGCAGCGTATCTGGGGCCCGGCCCGAAGATCTCGTCGGCAACTCCGCGCCGTCTGGTCCGGTGAATCCCC  
GAAGAGGTCTGCCATGGACCGGGGCCACTCGCTGATAAAGCGGCGGCGTGGACGTGCTGGGACGAGCGGTCTTCTGCCATCGTGGCGGATTTCGTCGAGCAGGGGCCGGCGTCGG  
TGGTGGATAACGGGCCGAGTGTTGCTCCGGACCGGCCAACTGGGGAGGCTCGGTGGATGACGAGCACAGCTCGTCGCACAGCTCCTCGGCTTTCCGTGGGCAGCGGCGGCGGC  
GTATTCCCGGGGGTTCGGCAGCGGAGGGCGGCT

>dmgsat-12\_D.leontia

TGGTGTCTGCCAGCGGCATTTTCGGCTGCAGAGTCCTCGTCGGTCGTCGATAAGGGAGGACGGCTCGTCGACGGCCCTTCAGGTCGGCGTCGGGCGACGACGGCTGCGTAACC  
TCCGGGCGGCTAGGTGTCTGTGCCGGTGACACCTCGGCTGCAGCGCAGCGTATCTGGGGCCCGGCCCGAAGATCTCCTCGGCAACTCCGCGCCGTCTGGTCCGGTGAATCCCC  
GAAGAGGTCTGCCATGGACCGGGGCCACTCGCTGATAAAGCGGCGGCGTGGACGTGCTGGGACGAGCGGTCTTCTGCCATCGTGGCGGATTTCGTCGAGCAGGGGCCGGCGTCGG  
TGGTCGATTACGGGCCGAGTGTTGCTCCGGACCGGCCAACTGGGGAGGCTCGGTGGATGACGAGCACAGCTCGTCGCACAGCTCCTCGGCTTTCCGTGGGCAGCGGCGGCGGC  
GTATTCCCGGGGGTTCGGCAGCGGAGGGCGGCT

>dmgsat-13\_D.seguyi

TATTTAGTTATTTAGT

>dmgsat-13\_D.vulcana

TATTTAGTTATTTAGT

>dmgsat-13\_D.mayri

TATTTAGT

>dmgsat-13\_D.bakoue

TATTTAGTTATTTAGT

>dmgsat-13\_D.pectinifera

TATCTAGT

>dmgsat-14\_variant\_1\_D.nikananu

AAACTCAACCGATTTTCAGCCTGGTTTTCGTTTTTTCTTCTTAGTTTTTATAGGAGAACATTTCTGCATTCAAACTTGATTTCCAATTTTTTGTCAATTTTGAAAAATTATTATG  
ATGAAACCCCTTTTCTTTTTTTTAGTGCCTTAAAAATCGCTCCCCTTTTCTTTAATTTTTTAAATCATAACTTGGCTT

>dmgsat-14\_variant\_2\_D.nikananu

AAACTCAACCGATTTTGAGTCTGGATTTCGTTTTTTCTTCTTAGCTTTAATAGAAGAACTTTTCTGCATTTAAAACTCGATTTCTCATTTTTTTGCCAAGTTTTGTAAAAAATGATG  
AGAAAACCCCTTGCAATTTGTTTTTTTAAATAGGTCATATTTTTTGGCCTAAAAATCGCTAAAACCTCCAAGGATTTTGATCATAACTTGGCTT

>dmgsat-14\_variant\_3\_D.nikananu

AAACTCAACCGATTTTCAGTCTGGTTTGGTTTTTTCTTCTTGGTTTTTAAATGGAGAACATTTCTGCATTTAAAACTCGATTTCTAATTTTTTGGCCAATTTTTGAGAATTTTGACG  
ATGTAACCCCTTTAATTTTTTTTGGCTCAAAAATCGCGAACTTCTTCTGTGGTTTTTTGATCGTAACCTTGGCTT

>dmgsat-14\_D.jambulina

AAACTCAACCGATTTTCAGTCTGGTTTGTCTGTTTTCTTCTTGGTTTTTAAATGCGAACATTTCTGCATTTAAAACTCGATTTCTAATTTTTTGGCCAATTTTTGACAATTTTAACG  
ATGTAACCCCTTACATTTTTTTTCAAAAATTGGGTCAAATTTTTTGGCTGAAAAATACTAAAACCCCTCATTGGTTTTATGATCATAACTTGGCTA

>dmgsat-14\_D.seguyi

AAACTCAACCGATTTTCAGTCCGGTTTTGGTTTTTCTTCTTGGTTTTCAAAGGAGAACATTTCTGCATTCAAAAATTTAATTTCTAAATTTTTCCCAATTTTTTTAAATTTTGAC  
GATGTAACCCCTTAAATTTTTGTTTGTCCCAAAATCGCATGGTTTTTTGATCATAACTTGGCTT

**>dmgsat-15\_D.jambulina**  
ATATGAAATATATGAAAT

**>dmgsat-15\_D.bunnanda**  
ATATGAAATATATGAAAT

**>dmgsat-15\_D.serrata**  
ATATGAAATATATGAAAT

**>dmgsat-15\_variant\_1\_D.seguyi**  
ATATGAAATATATGAAATATATGAAAT

**>dmgsat-15\_variant\_2\_D.seguyi**  
ATATGAA

**>dmgsat-16\_D.mayri**  
TGTATATTTGTATATT

**>dmgsat-16\_D.punjabiensis**  
TGTATATTTGTATATT

**>dmgsat-16\_D.bakoue**  
TGTATATTTGTATATT

**>dmgsat-16\_D.bocki**  
TGTATATTTGTATATT

**>dmgsat-16\_D.birchii**  
TGTATATT

**>dmgsat-16\_D.pectinifera**  
TATATAGTTA

**>dmgsat-17\_D.bakoue**  
TTATTATTGTTATTATTG

**>dmgsat-17\_D.punjabiensis**  
TTATTATTGTTATTATTG

**>dmgsat-18\_D.pectinifera**  
TAAATCGGCATTTTTATATCCTAATTTTTGGACAAATCAAACCTTAAGAATAACCATAAATTGGCCAAAACAGCCTTAAAAACAGCGATTCCGAATATATATGGCATTGGCTGT  
CATTCATTTTTGGCCAAATTATGCTCTTCAGAAGACATCAAATGCGGATTTTTGGGTCCCT

**>dmgsat-19\_D.birchii**  
CATTTATTAGCCTATTTTCATGAAATAGACCAATAATTCAAATTATTACACGAAATATTTTTTGATTATTATTGTTAACAAAAATGTGTCTAGTTATTGAGGAAAATGTAATTT  
AATACATAAAAACAGGTTTTAAATTACACAAATAAAC

**>dmgsat-20\_D.bunnanda**  
AATTTTAACGATGAGATCCCTTAAAAAATTTGAAAAAATTTTAAAAATTTATTTTTCTTTTAAATATAGCTAGATCGATTGCGCTGTTGATTCTGATTAGAATATATATGGA  
TTACAGGGTCGGAAATAACTCCTTCACAGCGTTACAAGCTTCTGGGTAAATTACAATATCATTCTTGATCGATATTTATCTATAATTTTATTGAACAATTGTTCAAAAAATCA  
AAAAATAAAAAATCTCGGAATTCGGAAAGCTTTTCTATGTTAGTTTTTCTTAGGTTAATAAATCTGCATACTAAATTTCAAATTTTTAAAAATTTAAATTTTTATCAATTTTTTT  
TTTT

**>dmgsat-21\_D.serrata**  
GTAAACTAAATATTTTACCGAGTTAAGCATACTTAATAAAACAAAACATCATTTGTACCGCGTTTTAAATATATATTTTGC GTTCGTCCAGCTTCTTAAATAAAATAGTTTAT  
TTAAAGTAGACCAAGTAATACTGTTGGGGCGCCCTTAAAGCATAAATTATATTGTTTTCCCAACCACGTATTCAATTTATAAAAAATAACAATGCCCACTGAATAATATGAA  
TATAACAACCCTCAATAATAAATCAAATTGCTTCTAAACCGA

**>dmgsat-22\_D.bunnanda**

CAGTGAAGGAGTCATTTCCGACCCTATAAATCATATATATTCTTGATCAGCATCAACAGCCGAATCGATCTAGCCATCTCCGGACGAAACTAAAATTTTCAAAAATTGGCCAA  
AAATTGAATTTTTTTAAGTTTTAACTGAGTATGCAGATTTATTAACCTACTAAAACTAGCATAGAACAGCTTTCCGAATTAATAATGCTTTTTTGGCTTAGTTATGAGA  
TTTTTAAATCTTGATTTGTGCGAAAAATACTCATATAAAAAATATCGAAAAATGTACTAAAAAATGGTATTATACTTTTTATTTCAGAAGCTTGTAACG

**>dmgsat-22\_D.serrata**

CAGTGAAGGAGCCATTTCCGACCCTATAAATCATATATATTCTTGATCAGCATCAACAGGCGAATCTTTCTGGCCATCTCAGGTTGCAAAACAGACATTTTCAATTTTTTCTAA  
AAAATTAAGGGGTACATCATTAATAATTTGCAAAAAAGGCCAAATCTTAACAAGTTAAATGGAGTATGCAGATTTGTTAAGCGCCAAACAAC TAACACAGAACCCTTTCCG  
AATTGAAATTAATGCATTTTTTGGCAAAGTTATGAGATTTTTAAACTTTTGACTTTCCCAAAAAATAC TAAAACAATTATGAAATAAAAAATTTTCGGTTTCAGGAATCGTAGAGGAA  
AATATAATTTTTAT

**>dmgsat-23\_D.kanapiae**

TGGTCTGATGACCTGATCTGGTAAACAGACC

**>dmgsat-24\_D.bunnanda**

CATGGCTGCTGCATGGCTGCTG

**>dmgsat-25\_D.seguyi**

CAAGTGTGACTTTTTCATCCTCAATAGCCCATTTCCGGTCCCTTTACAGTGGCCATGGGCGGCAATGCGACGGGAGGCGTACGGTGCCTCTCAACTGATCGGTCTCCTTCCTGACC  
ATGTGTCTCACAGTGGCTACTTCTGTGTTGAACTAGTGGTTACTAAAGATAAAGCAAATTTGTGGCTAAGTATATTTACCACATTGACGACTGCCTTGCGGGGCGCTGTCTAGA  
TGGGAGCTGCCTAAGTAGGCGTACCTCACCCGATCACCGTCGGACGAGGAGTGAAATTC AAGGCTCTGGCCCGCTTATATAGGGGCTGACGATATTTAGTGTGCCCGCCG  
CTTTAAGAAATTTGT CATATTAGAGTGGCCAACCCCATTTTT

**>dmgsat-26\_D.nikananu**

ATTATTAACACGGATGTGTACGGGTGAAAAGCTGCGGAGAGACTGAGGCTGCTGCGGCGAGTCGCCTCTATTTATAGGTATGAAAGATGGAGAGATTATATAAATAAATAGATT  
TTTTGCGCTTACCGATCGGTCCCTTTAGCTTTATATATAGGATATGTATATGATAATAGTCTTGGTTCGAACTTACCCGTATTAGAGGACACTAGTTACCTTTTCGTTGCAACAC  
CGCAGACTTGGCCGAGATTTCATCGATGATTAAGTCTTTTTGAGTGCAGAGGTTCTTTACCCAGTTATTAACACACTTGTTTACACACTTTTTTAACACGTG

**>dmgsat-27\_D.truncata**

TGATATGTACTTAAGCTCAGCTGCTAACTTAAGAACGACCATGGAAATCCTGGATTGTGACGTCATAAGATCGCCCTTCTCTGCGCTTCTCA

**>dmgsat-28\_D.pectinifera**

CAACCAGTATCCAGGAATCTCCTCCACCAACAATTAGGTGCCAACATTATCACTGTTTTAGCATGACCCAGTTTCAGGATACACATTTTCCCGCAAAACGAGTGGCCAATCCCGGC  
CAGAATAGAGCCAATCCTCTCCAGAATCGCATATTGGGGAAAGATGAGCATAGCAATGCATCCAAAAATGTACAATTGCCACCCATCTTATTTGGAGCCACCTTAAGAGCCTGG  
GACTTGTCTTTTAGCATACACCTAGCTGCCACAATTTACCCGATTTAATGGGGGAGAGTCCATGAACAATCATTGCCAACGATATAGAGCCAATTATGGACCAATCCTCTCCAG  
AATTCCACCTGATCCCGGCCAGAAATTGGCCAAGTATCAACAAACTCGCCAGTTGCCGCTCTCATTTACAGCCCTCACTCCTCCATGCATGACCCCTGGCCAATAAACATGACCC  
GCCATGGGAGCAGTGGCCAATCCTTTCCAGAATTTACCACAATTTCTCAGCATTTCTAGCAAAATTTGGGAGAAATTTACCATTG CATATTTATAACCTTCAATCCATATCGGCGG  
AGGAGGGTCCATTATCCCTCAGAAGCGACCAGTTCCAGCCATCCAAGGCCTAATCCTCTCCAGAAACAGCCGATCCCGGCCAGAAATA

**>dmgsat-29\_D.bunnanda**

ATCACCGAGCTATCACA

**>dmgsat-30\_D.kanapiae**

ATTTAAGGCTTTTTACTGCTTTTGC ACTTAAGCGCTTTT TAGTCGACAGCAGTTTTT TAGTTTTTATTTTACAAATAATATGAAAGCTAGGTGCGCCAGCATTTGTGTAAAATGTTTT  
TTTACCTAAAAAGCTTTTCCAATATGGTCATATAAATTGAAAAAGTAAAATATAGCTGCGCCATCTATAGTGTAAATTTTTCTTACAATGTATATTTTAAGTAACGTCAAATGTG  
ATTTAACTAATACTAACAGCTAGCTGCGCCATCTATTGTGTAAAATGTGTGTATCATGTAAAATGTAGCAAGTACACATTATATTTCTTGACAATATGACAGTAGCGTTTAGGT  
AGTGGTCTGGAGCTGATGTATACGCGTTTCGGCTCCCGCGATCATACGACAAAATTGGTCAACAACGTATAATGGACACATGTGTATTGTGACAAGTATATCATTGTGACATGGG  
ATCAATGGCAGAAGATAGGTGCAGTGGTAAATACTTTACCCACAGCATAGCGGGAAAGTGAATAGTGGAGTGGTGTGGTTTTAGAAAGTTCCGCGGGTGTGGCCGAGTGGGAGA  
TATGCCAAATGTGCGCAACACAGTCATTTTAAAGTATGCATGTGTGTTTTATACCAAATAAAGCTAGATAGTAAAAATATAAAATTTATATTTAATCTTTTTTATTGCAGGTTGA  
GTATGCAACTTACAAAGTTTGTTTTACGCGTGGACAGTAGAGAAACAACAATAAAATATAGTGAAAATAAACGCAAATATGAGACAGCGGCAGCATTTTGGTAATATTTTTTTA  
CA

**>dmgsat-31\_D.burlai**

GACGCCATTTTGTCCCAATATTGCAACACAGCGATGGCGGTAGTAA

**>dmgsat-32\_D.bunnanda**

AAAAAGCGCCACTAATTCGGGGTTTTGAACTATTATGTGGCGCCAATTCGCGGGCACATACGGCAACTATACATTTTATACGTGTAAAACCTATTTTACTACGTAAATCAAAAA

ATATCAAAAACGCGCCACTAATATGGTTTTTTGAACTATTATGTGGCTCCATTTTCGCGGCCGCATACGGTAAACATACAATTTATACGTGTAGAGCATATTTTACCATAATTTT  
CCTAATTTTGCTAAAATTGCCAAAATTCAAAAATTCTCTTATTATTAGCATTGCTCAGCGTCGTAAAGCTGATAAAACCGCTAGAAATCAAAAAATACATACAATTTATACGTG  
TAAAACATATTTTCTATGTATTTCTTAATTTTGCTAAAATGGCCAAAATCACAACATTTATATTATTATTAGCATTGCTCAGCGTCCTAAAGCTCATAAACTGTTAGAAACA  
CAAAAAATCGAAAAGCGCCACTTTTTGGTTTTTTGAACTATTACGTGGCGCCAAGTCGCGGCCGCATACGGCAACTATACAATTTACACGTGTAAAACGTATTTACTACGTAA  
ATCAAAAAATC

**>dmgsat-33\_D.pectinifera**

ATACAAACACATGTAGAAAAACAT

**>dmgsat-34\_D.jambulina**

GAATAGAGGA

**>dmgsat-35\_D.triauraria**

TTAT

**>dmgsat-36\_D.watanabei**

TGATATGATATGATATGATA

**>dmgsat-37\_D.pectinifera**

TGTGATATTGTGATATATGTGATATT

**>dmgsat-38\_D.birchii**

AATTTCAAAAATTTCAAA

**>dmgsat-39\_D.serrata**

AGATATAGATATAGATAT

**>dmgsat-40\_D.bakoue**

TGATATATTGATATAT

**>dmgsat-41\_D.bocki**

CCCCCAATATTTCTTTAAAAAATTTTTAAAAATTTTGGGTAAATATAAAGGCAAACTGAGTACGCAGTTTTGTGAGCGTAGAAATCCCAATTCAGAACAGCTTCCGCATTG

AATTTTCATGCGTTTTTGGCCGAGTTATGAATTTTCTAAAATGGTTATTTCCCCCGAAAAATTATCACAATAAATGGCACCCATTTTTTT

**>dmgsat-42\_D.vulcana**

GAAGGAACAAGGAACAAGGAAGAAGGAA

**>dmgsat-43\_D.watanabei**

GTTTGATTTGTTTGATTTGTTTGATTTATTTGATTTATTTGATTTCTTTGATTTCTTTGATTTCTTTGATTT

**>dmgsat-44\_D.birchii**

GAAAAGATTT

**>dmgsat-45\_D.truncata**

TGAAAA

**>dmgsat-46\_D.jambulina**

TACTTAATACTTACTACTTAC

**>dmgsat-47\_D.burlai**

AATATATC

**>dmgsat-48\_D.bakoue**

CTGT

**>dmgsat-49\_D.tani**

GTTTCCTTGAGACGGCGATGACGATGATGTGGCCGTGGCGGCCCTTGGAGCCGATGGCGACGACGATGCGGCCGTGGTGGCCCTTGGAGACGGCAGCGACGATGATGTGGCCGT

GGTGGCCCTTGGCGACGATGACGATGGCGACGAGGATGCACCCGTGGTGGTTCTTGATGACGATGACGTGGCCCCGAGAGCCCAGATGCTGTGGTGACCGGTC

**>dmgsat-50\_D.jambulina**

ATAAATGATAAATGATAAATG

**>dmgsat-51\_D.burlai**

ACGAAAAATACGAAAAAT  
>dmgsat-52\_D.bakoue  
GTTTATT  
>dmgsat-53\_D.seguyi  
ACAATAAAT  
>dmgsat-54\_D.pectinifera  
TGTGATAGATAT  
>dmgsat-55\_D.truncata  
GTTCAAAAATTTGTCCAAAATTTT  
>dmgsat-56\_D.bunnanda  
CAACATCATCATCAG  
>dmgsat-57\_D.pectinifera  
AAGCATGAAAGCATGA  
>dmgsat-58\_D.mayri  
AAAATTTTGAAAAATTG  
>dmgsat-59\_D.bunnanda  
TTACGTTACACTACACTACA  
>dmgsat-60\_D.boeki  
TTTTGAAAAAATTTAAAAA  
>dmgsat-61\_D.burlai  
ATTCCACCCCTTAGTGTGACCGTATTGGCAACTTTGTTAGGTGTGACCATATTGGCAAAAGTCGTATTTGTCTATCGATTAAGATCTGGCGTTGCCAGACTTTTCGAACGCAAG  
CCGATGGTGTGCCAGACTTTTAACTTTTGAGGGATTTTCGGCGTCTTTGTGTGCCCATCCGCCGTGGAGGCGGAAATGTTTTGTGTATTGCCAATGTTGTTGTAGGCAAAA  
CAAGGTCTTAATACCGCCTTTTAGCAGTACAAAATCATCAAATGCTGGATTTTCATGCACCAGGCGCGCAGAAGCAGCAGCAAGTAGATAATAAAAAA  
>dmgsat-62\_D.mayri  
GTTAAATAGTTAAATA  
>dmgsat-63\_D.burlai  
TTCCCTACATGGGATTTGGACGTGCCCCAAATTGGCCAAAATTTGACTAAAAAATTGGGCCACGTATTTGAGCCTGGGACATCAACTAGATAAAGGTCCTAACTATTAGTATGC  
TTAAACTATACTTGTAAGTGAAGGATGCCAAAGTTAAGTAAATTCACGGAAGGGTCTGCTGCTGATGGCTGGCGGCAGCGCAGTCGGCGTCAATAAAAAATGACCTCTACCA  
AAAAGGGTCGAAATTGGCCTATAAATTCCTGCCACGATCTCGGACTTGATGGTGTCCACAAGAGGATGGTCTGAGCTACCTGTGTGCCCTAGTTTGAGATATATAGCTGCATGGA  
TGAAGGAGTTATGCGATCCTGCCAATTGACGATTTCTGACGAAATTTTTCTCTCATCGTAATAATTCCAATCAAATCCGTTAAAATCCAAATGTAAATTGACGATGCGGAGA  
AATGTAAACAAAACGTGCACTTACCCTGGAAAAGAGAAGAAAATATTAATAAATATTTCTAAAGACTGATTTATATTTAAATTAATCACCCTTTGCATATAGATGTAACCGGATGGT  
GATGATAAAACAAACGTTGTTGGCTGCAATTTCCGGGTATTATTGCCTGCTTGCCCTTTGGAAATAAAATATATCATTATTAGCTAAATGAATTAATTAATGTTTTAACAAATA  
TTTTAATAAATGTCAAATGTCTGTCAATAATTATCATAAAATTAACAATAACTTAAATAAATAATATAAATAATCTTAATTAATTAATAGCGACGTGGGATAAAACCAGCAAG  
CAGTCAATAAATAAAACAATAATAAAAAACCAACTCATTAATATCTTGCATACAAAACGACATATTTAAAGATCCAATAAATTAATTAATAAATTTATAAAAACTTAAATATT  
TAAAAATTAAATATTTAAAACGCATTTAAATTGGTAGACTTAGTACGGAGGTGCCCAAAAACCTATCAAAAGGGGGATTAAAACTTGGATACACATCTGGGGTCAATCATAGC  
CAATAGATAAAGGCCCTTGGCTAGTTGGTTGCTTAAATGAGGTCCGTAACCTCAAGGATGCCGAAGGTATGCATTTGTGCAATTGGAATCGATTATGCTGGCTGTTGTAAGCG  
CCGTCCGCGCTAAGTTTTGTATGGTTTTCCAAAAAAGGTCAAAACACAAAGAATTTCTTGGACCACGCCCTTCTCACCTTTTGGGTGGCATTAGTAAGGCTTAAGCTAACATATG  
TACACAAACTCAGGTCACTGGCTTCGAGGATGAGGGAGATCTCACCTTTCGCTGAATTGTCAAAAACCGCACATATGCACGATCCGTGCGTCAGTATGGAGGCCCCCAAAATCGG  
CGAAAATCTGACTTAAACACGCTTTTTACGCTATTCTGACAAGATGGTCGCCATGAGGGAGGTTCAAGCTAGTTATGAACAAAAAATTCAAGTCCCTAGCCCCAAGGACGAAGG  
AGATCTCACTTTGCGCAAATTGGGTAGACAATCACACAAATGCACCGTCCGTGCGTGTGTATGGAGGTGCCCAAAAATGGCCAAAAAAGGCTTAAAAAACCGTCCACGCAATCG  
GGCCTGGGGCTACTATTTGATAAAGGTCCAATCTAATTGTATGCAAAAAAGTAGTCTGTAACTGCAAGGATGCCTGTTATGACAATCTACAGGTCTTGCTGCCCGTATATGAC  
GGCAGTCTGTGCCGTAGTACAAAAATTACAAAAAATGGTCTTCGCCAAAAATGGCCAAAAACCGACAAGTTTTTGGGCCACGCCTTCGAGCCTTTTTGGGTGCCATTAGGAT  
GGACTAACTAACTGGCTACATAAATTCAGACCACTAGCTCTAAGGACATTGGAGAAATCTTGACGCGTAGCA  
>dmgsat-64\_D.seguyi

ACAAATA

**>dmgsat-65\_D.pectinifera**

ATATCACCAATATCACCA

**>dmgsat-66\_D.bakoue**

TCTTGATATCTTGTTA

**>dmgsat-67\_D.bunnanda**

TGAAATCGGTTGAGTTTAAGCAAAGTTATGATGAAAAAAGTATTTTCATATGAAGCTCGATTTTTTTCATTTTTTGATAAGGGGTACATCATTTAAATTTGTCAAAAATTGGAAAT  
CGAGATTTGAATGCAGAAATGATCTCCTATAAAAAACCAAGAAGAACACACCAAACCGAAC

**>dmgsat-68\_D.seguyi**

CAACAACAG

**>dmgsat-69\_D.mayri**

AAGTATATAAGTTTAT

**>dmgsat-70\_D.mayri**

AAAACGTCCAAAACTATCGC

**>dmgsat-71\_D.bakoue**

TGATATGG

**>dmgsat-72\_D.mayri**

TGTTGCAGCCTGCCAATCTACGAAATTTGTGTAGCACAGAATTGGCGCTCTTCGACTGCACCTCCGTACAAAATATTTTTCTTGTTGTTCTAGCAGTCAAATTTCTGTGTCTCAC  
TGCTTTACCGCTATATAGTTGTTGCTGTTATTGCAGCCTACCTAATCTACGACCTCTGTGTTGCTCAGAATTGGCGGTCTTCGACTGCGACTCGCTCGCCGATGTCATGCTTGC  
TGTTCTAGCAGTCGACCTCTGTGTGCGCACTGCTTTAGCGCTCGCTTGTTGTTGCTGT

**>dmgsat-73\_D.bakoue**

TCTTTATTCTTTAT

**>dmgsat-74\_D.mayri**

ATGATAAA

**>dmgsat-75\_D.seguyi**

TATTTGTACATTTGTA

**>dmgsat-76\_D.mayri**

GTAGACTTGCGAGTCCGCCTCTCTCTGAAGACTTTTCGAGTCCGCAAAC

**>dmgsat-77\_D.seguyi**

TGATTCTCTTGCTCTTGCGGCTGACCTAGCGGTCCCCAAG

**>dmgsat-78\_D.seguyi**

ATAAGTAAATAAGTAA

**>dmgsat-79\_D.boeki**

TACCTATAATTTATAAGAAATTGGCGGAACAACAATCGGCGGAAATCTCATAGCTCAGCCAAAAATGCATGAAATCCAATTCGGAAAGCTGTTCTGAATAGGTTTTTCTAAGC  
TTAACAAAACCTACATACTCAGTTTTGCTAAAATACTTACCTATAATTTATAAAAAATATTTAACCTATTGTT

**>dmgsat-80\_D.mayri**

GTTTTAAAAATAAATCAAAATCAGCAGCAATTCAATTATCATAGTACACAGAGTCAGAGAAAGAGAGTGCGGGGAGAGCGCAGTCTGTTAGTTCAATGGGGTCATAAAATTTGGTT  
TTAGCTGTGCGTTGATTTCTTAGTTTTTAATAAAGGGTAGTTCAATGCTTGTGTATAAATTTGAATGAATTATTATTTTCGTCTTTAGGTTTCATGTATTTTTTTTTTAATTTACCTA  
GAGCTTCAGGAAAACCATATGAATCCTTAAAGTATCTGGATTCCCTCGAAAAAATTTCTTATGGCTTATTGACTTAAATCAGTGTTTTTTTACTGTGAGAAGAAAATGGGGA  
AGTTTTACAGATTTTTTCAAAGCGATAAAAAATAGTAATTTTTTAATTTATTGTTAAGTTTAATTTTATTTTAAATTTTAA

**>dmgsat-81\_D.leontia**

TGAACCTGGCGCCTCCACCGGAGCCGGGCACCTCCGCCGGAGCCGGACGCCACCGCGGGAACCGGACGCCTCCACCGGATCCAGGCGCCACCGCGGGAAACGGGCAGGACCGCG  
TGAGCCGGGCGCTTTTCATCAATTTCTTATAAATTATAGGTAACAATAGGTTAAATTTTTTAAATAAATTATAGGTAAGTATTTTAGCAAACTGAGTATTCAGAACAGCTTTC  
CGAATTGGATTTTCATGCATTTTTTGGCTGAGCTATGAGATTTTCCGGCGATTTTTTCCCGCCATTTTTTTTATAAATATAGGTAAAAAATCCGAGCGACCAAAGTACCAGATCGT



CAGAAATATATATCGGCCAAAAAATTCAGAAATTAGTTGGCTATGAAAATATCGATACTTGGTATTTCTCAAATATATTCTCTTGGTCACACTAAGCCTCGCCTCGGCCCTATA  
AAAGACGGGCCACAGCAGTGGGGAAGCCATTGCGCTGTTGACCGGCGATCGGTCAAGTACTCCGAGGGAGGAGTAACCAAGGAGTCATCCCGTGGAGTGGATCGCCGGATCAAT  
GCGTCCATGTCCCGGGCACCACGCGGGAGCCGGGCGCTACCACCGGAGCCGGTCACCTCTGACGAAACCGGGCGCCACC GCG

**>dmgsat-82\_D.nikananu**

TTTCTTTGCTCGTTTTCTTTTTTTCTTTTGTCTCTTCTAGTTCTCCCTCTTCCTTTTGTCTCTCTTTCTTTCTGCTCTCTTTCTTTTTCTTTCTTCCTTTTGTCTGCTCTTTCTT  
CTTTCTTTCTCTCCGTCTTCCTTCTGTCTCTTCTTTGGCTCCCTTTCTTCCTTTTGCCTTCCTTTCTTCTTTTTCTCTTCTTCCTTTTGTCTCTCTTTTAGTTCTCTCTTC  
CTTTTTCTCTC

**>dmgsat-83\_D.seguyi**

TACTTTTTGATTTTCAAAAATGTTTGAAAATTTTCGAAGTTTCATATTTTCGAAACGGGACGTGGTAAAAAATGAAAGAAGGGCAAACATGGTCAAACGAAGGGTAAAGA  
TGGTCAACTTTCAAATTTCAAAAATTCAAATTTTGATAGAACACTTTTGAATATTTTCTGAATTTGGAAAATTTTCAAATTTCTAAAGGTGGGCAAACGTGGTCAAACAATTC  
TAATGCGATTTCCAAAAAATTTTGAAAAAGTT

**>dmgsat-84\_D.mayri**

TTTTTTGGGAATTTCAATTATCATAACTTGGCCAACAGGAACTAATTTTGAATCGGAAAGCTGTTCTATGCTAGTTTTCAAAGGCTAACAAATCTGCATACTTACTTTTTTCA  
ATAAACAAACGATTTAATTTTTTTGAATTTTGACGATGCAACCCCTTACAAAATTTGAAAAATTTTTTTGGCTCA

**>dmgsat-85\_D.burlai**

AAAAAAAACGAACAAAAATCAACTTTTGAAATCTGGCATTTAAGTATGCAATTTCATAGATACAGAAAGAAATAGCACAGAAAAGCTGTGGAATCAAAATTAAGCATT  
TTGACGGAATTGTAACCTCTC

**>dmgsat-86\_D.kanapiae**

GACAAAATTATATCTAACATGCCATCAGAGATGCTCATCTAGCTATATTGCATTATTGG

**>dmgsat-87\_D.pectinifera**

TATCACCAATATATCACGAATA

**>dmgsat-88\_D.birchii**

AGATTTACA

**>dmgsat-89\_D.jambulina**

TCGTTACAGGCGACGGTCACACTGAACTTCGCCAGGGCCCTATATAAGGCGGGCGACACTCTTGGAATTTCACTCGGCGTCCGACAGCGATCCGATGAGGTAGCTTATATCCAG  
AGAACAACCCGCCAGGCAGCTGCCAGTGTGGTGAATATACTAAGCAACAAATTTGCTTGATTTGTAGTAACCTAATCTTACTCAACAGGAAGTAGCTACCCCTGAGGCACATGTT  
CAGGATGAAGGCCGAGGATTGAGAGCACCTGCACCTCCTGTGCGATAACCGCGCACAGCCACAGTATAGGAAAAATAACATAAAGAATTCGAGTCATAAGAAAAATATTTGA  
ATTTAATGCGCGAGCGCAATTGATCGTAAACGCCAGGTACACTGGATCGAACAGGCGTTGGCCACACTAATACGGCAATT

**>dmgsat-90\_D.vulcana**

GTGAAAAGACTACCCATGATAGGGTTG

**>dmgsat-91\_D.punjabiensis**

GAAGCCTTTCTCTCTAACGGTCTGGCAACCCTGAAAATATGGATGAGAATCGCAGAGAAGGGCGCTTCACCTTAACAGTATGTAATTTGCAGAGGAAGGCCTACCTTAAGTACA  
CAGTATGAGAATCGCAGAGAATTTGCGTTGCAAATTTCTGCCTGAAATTATAATACCCTGCAAGGTATAAAAAGTGTAACCCCGAGTTAAGTATAGAAAGCTAATATTTTTAT  
GGCTGCCATATTTCAATTTGATTAAAGTCTATCAACCGCCAAACATTAGATTAGTTGGTTTTAAACAAAGTTTGGAGTTTCTAGCCTTGACAACATCTATATGTGAATATCTATG  
CAAAAAGAAAATTATACATAAAGAGGAAATGACAAGTGCAAAAAGGGAATTGCTTAGGTATGTAAATCGAAAAGAGAGGCACCTTACCAACAGAGTATGTAGAATCGCAGAGG

**>dmgsat-92\_D.burlai**

TGGCGCGAGGACCGCGTCTACCATTGACAATTTCTGGCCCAACATTGTGAGCGGATTGCATGGGATCGCAGCAGAAGATCCAGCTCATCCAGCAAGTGGTGACGCCCAAGGGC  
GAGCTGACGAATGTCCCGTGAGTGTAAGCAGGGATATATTCAACCGAAAGTCAAACCTAACGAGCAACTTCTTTCCCTCAGATCGCCACCAATGCCAATGAAAAAATCTCGC  
ACATGTGTGCATATAATTCTCAACTGGTTCTAACCTCCCGGTATGAAGACACGGCCAAGTCGCAGGTGAACAATGTGATTTAAGGAGATTGTGGAGCGCGCCAAGCCGCTGTC  
GATCCGCTGACTAACCCCAACGATCGTCTGAGTGGTGAACTGAGCTCGGCCGTGCGCCAGTCGTACGCCGTGGCAAGGGCCAGGCTTCAACGCCG

**>dmgsat-93\_D.tani**

CATCAGATAGGAATAAATGTGGTGTGCTTTGCTCCGTATTTAACACCAGAAGACAACAGTACCTACATCGTTTCTGTTGCTTAAGCCTTTTAAAAGTTATGGGCAGATTATTTT  
TTATTGAATATATTTTGAACCGAG

**>dmgsat-94\_D.kanapiae**

TGAAAAATTTGAAAAATT

**>dmgsat-95\_D.punjabiensis**

CAAGAAGAAGAACAAGGAGAAATGGTTCCCCGCCCTCGTTGTGACGCCTACTACACAGGTGAGCTGAGAATTTGTTTTTCATACAGGATATAATAATGATTGATTGCTTTTCTAC  
ACAGGCCACAGTCCGCATCCGCGTGAAGGACGAGTACCTGGTACATTTCGTCCAAGGACGGCCGTTACTATATGGTCCCGAAGAAGGAGGCCACCGAGTACACCCGCGCAGTGGC  
AAGTTGCGTTTACCGCCTCCAGTCAGCGGTTGGAGTGGGAGCAGCAGCCCCGGAGCAGTAGTTGCC'TTGGTAATTACCGCTGTGTTGCCGCCAACAGCGGGTGCAGGATCAG  
GCGCATCCGGAACGGGTTTCGGCCACAGCAACGGCCACTACCTCAGGTGGCGCTGCTGTCTGTGGTAAGCTCGGCGGCCAGGAAGCAGGCCCTCAAGGCAAGCGCCATTCAGCATA  
GCCTAAAAGGACGACTGACGCCCTCGGCCGTGGCCAATCCAGTCAAGATGCACACGCCACGAGGAGCAGAAGCAGCGTCTGCCAAGGAGGTGGTCAACGAGAAGGAGAAGAATA  
TCGGCAAGGTGGTGTGCGTGGAGACAGAGTC

**>dmgsat-96\_D.punjabiensis**

CTTATTCTCAATCTCAATCTGAATCTCATT

**>dmgsat-97\_D.bunnanda**

TTAAAATTTAAATTTTTTG

**>dmgsat-98\_D.bunnanda**

GAATGAGGAGGAATGAGGAG

**>dmgsat-99\_D.truncata**

AAATATACCA

**>dmgsat-100\_D.seguyi**

GAAAGATGAT

**>dmgsat-101\_D.bunnanda**

ACAATGTAACAACAATA

**Figure S1. Graph layouts of dmgsat-1 clusters retrieved by TAREAN. (A).** *D. asahinai* dmgsat-1 cluster. **(B)** *D. tani* dmgsat-1 cluster. **(C).** *D. lacteicornis* dmgsat-1 cluster. **(D).** *D. rufa* dmgsat-1 cluster. **(E).** *D. auraria* dmgsat-1 cluster. **(F)** *D. triauraria* dmgsat-1 cluster.

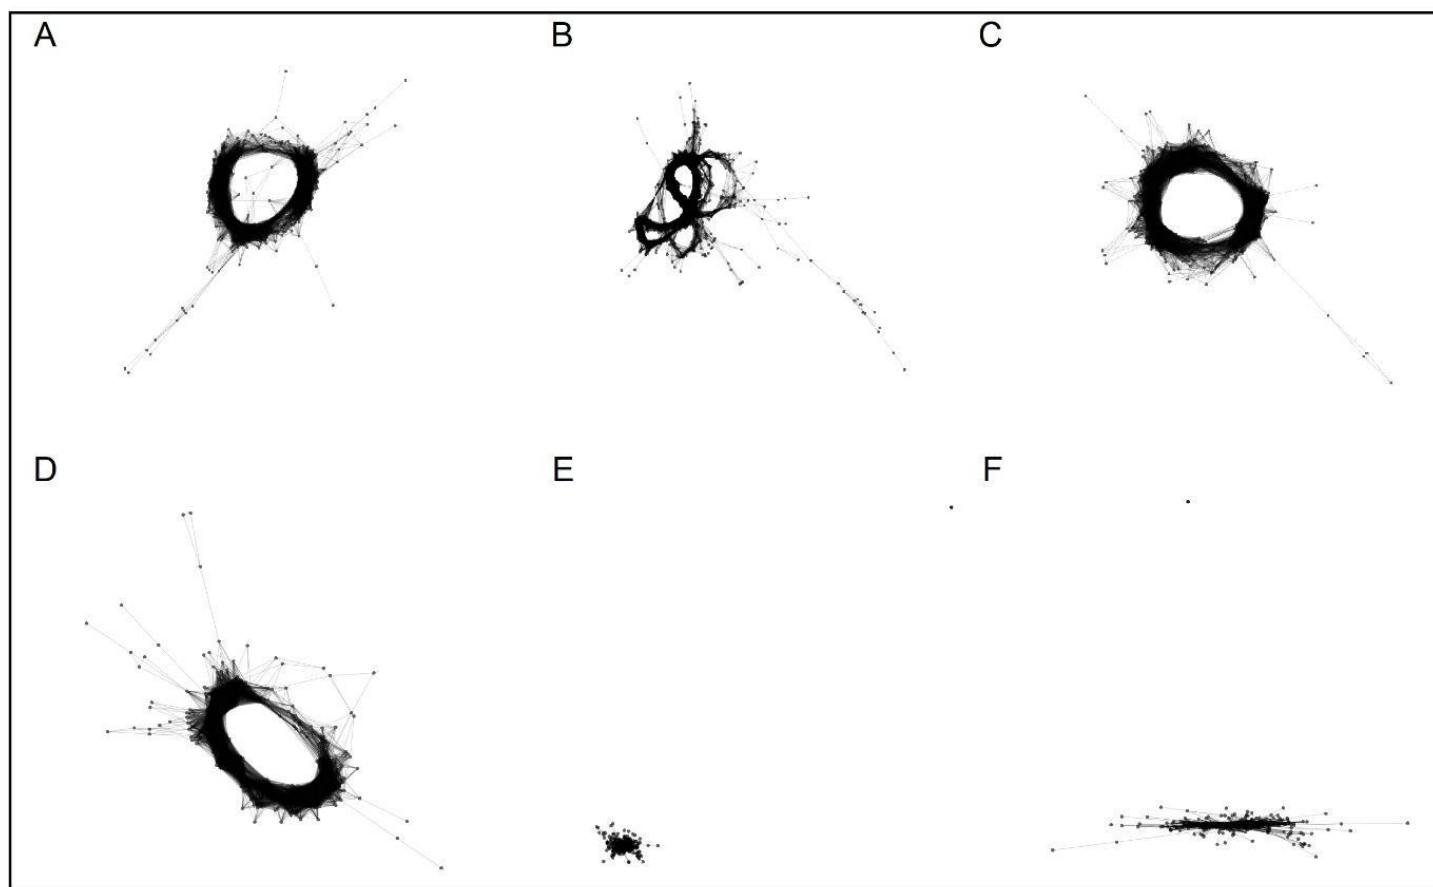

**Figure S2: Correlation test between genome size and contribution to genome of the 397 initial clusters retrieved by TAREAN (see Figure 2) from the 23 analyzed species from the *montium* group.** The p-value was obtained with Spearman’s correlation test. The colors are based on subgroup classification proposed by Yassin (2018) [29].

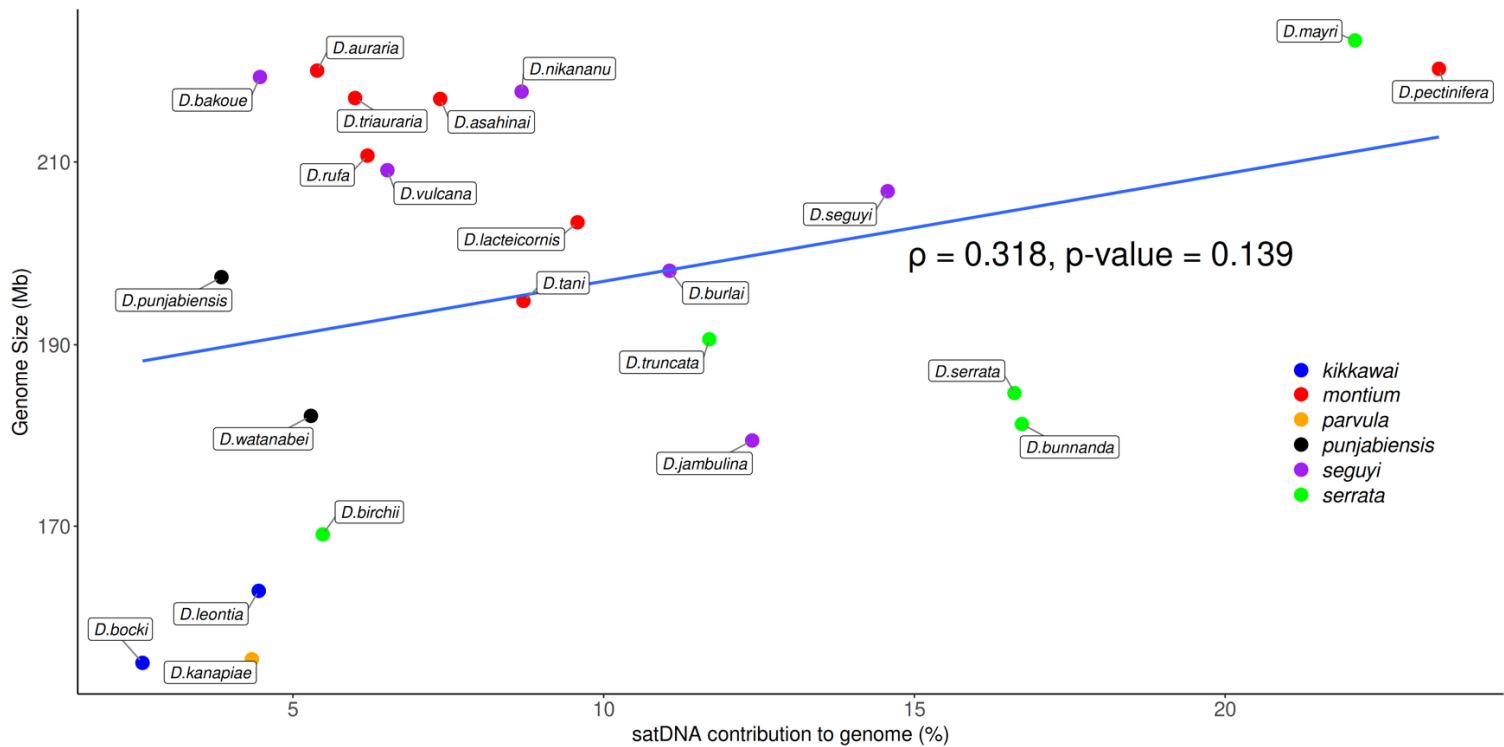

**Table S2. SatDNA families in the *montium* group sharing homology with Helitron transposable elements.**

| SatDNA Family | Species                | Consensus size (in bp) | Helitron Hit (s) (Rebase search) | SatDNA hit fragment (From/To) "bp" | Correspondent fragment on Helitron sequence (From/To) "bp" | Similarity value between 2 aligned fragments |
|---------------|------------------------|------------------------|----------------------------------|------------------------------------|------------------------------------------------------------|----------------------------------------------|
| dmgsat-1      | <i>D. asahinai</i>     | 374                    | DNA4-1_DK#RC/Helitron            | 19-201                             | 126-312                                                    | 0.7845                                       |
| dmgsat-1      | <i>D. rufa</i>         | 368                    | DNA4-1_DK#RC/Helitron            | 23-212                             | 117-312                                                    | 0.7720                                       |
| dmgsat-1      | <i>D. lacteicornis</i> | 374                    | DNA4-1_DK#RC/Helitron            | 134-316                            | 126-312                                                    | 0.7889                                       |
| dmgsat-1      | <i>D. tani</i>         | 374                    | DNA4-1_DK#RC/Helitron            | 50-230                             | 137-320                                                    | 0.7337                                       |
| dmgsat-1      | <i>D. auraria</i>      | 367                    | DNA4-1_DK#RC/Helitron            | 1-97                               | 223-320                                                    | 0.7959                                       |
| dmgsat-1      | <i>D. triauraria</i>   | 366                    | DNA4-1_DK#RC/Helitron            | 227-359                            | 187-320                                                    | 0.8000                                       |
| dmgsat-7      | <i>D. mayri</i>        | 150                    | Helitron-N4_DSer                 | 25-150                             | 435-562                                                    | 0.7795                                       |
| dmgsat-7      | <i>D. serrata</i>      | 153                    | Helitron-N4_DSer                 | 1-149                              | 344-491                                                    | 0.9195                                       |
| dmgsat-8      | <i>D. truncata</i>     | 198                    | DNA4-1_DK#RC/Helitron            | 49-191                             | 174-315                                                    | 0.7413                                       |
| dmgsat-8      | <i>D. truncata</i>     | 194                    | DNA4-1_DK#RC/Helitron            | 28-191                             | 146-315                                                    | 0.7305                                       |
| dmgsat-14     | <i>D. jambulina</i>    | 208                    | DNA4-1_DK#RC/Helitron;           | 24-190                             | 138-313                                                    | 0.7193                                       |
| dmgsat-14     | <i>D. seguyi</i>       | 178                    | DNA4-1_DK#RC/Helitron            | 13-178                             | 132-313                                                    | 0.7229                                       |
| dmgsat-20     | <i>D. bunnanda</i>     | 346                    | DNA4-1_DK#RC#Helitron            | 1-175<br>229-340                   | 10-184<br>188-299                                          | 0.7543<br>0.7857                             |
| dmgsat-22     | <i>D. bunnanda</i>     | 324                    | DNA4-1_DK#RC/Helitron            | 48-314                             | 10-322                                                     | 0.8303                                       |
| dmgsat-22     | <i>D. serrata</i>      | 356                    | DNA4-1_DK#RC/Helitron            | 21-291                             | 42-322                                                     | 0.8168                                       |
| dmgsat-41     | <i>D. bocki</i>        | 202                    | DNA4-1_DK#RC/Helitron            | 54-148                             | 223-320                                                    | 0.7396                                       |
| dmgsat-67     | <i>D. bunnanda</i>     | 174                    | DNA4-1_DK#RC/Helitron            | 56-107                             | 131-193                                                    | 0.9259                                       |
| dmgsat-79     | <i>D. bocki</i>        | 186                    | DNA4-1_DK#RC/Helitron            | 46-138                             | 223-315                                                    | 0.7634                                       |
| dmgsat-81     | <i>D. leontia</i>      | 653                    | DNA4-1_DK#RC/Helitron            | 216-267                            | 264-315                                                    | 0.8269                                       |
| dmgsat-84     | <i>D. mayri</i>        | 189                    | DNA4-1_DK#RC/Helitron            | 19-177                             | 145-314                                                    | 0.7546                                       |
| dmgsat-91     | <i>D. punjabiensis</i> | 455                    | Helitron-N4_DSer                 | 138-186                            | 1-49                                                       | 0.9796                                       |

**Table S3. Top ten contigs (sorted by total score) containing copies of dmgsat-7 in *D. serrata*.**

| Species                   | NCBI Accession  | Accession length (bp) | Largest number of uninterrupted repeats found |
|---------------------------|-----------------|-----------------------|-----------------------------------------------|
| <i>Drosophila serrata</i> | MTTC01000695.1* | 82,685                | 540                                           |
|                           | MTTC01000697.1* | 54,943                | 359                                           |
|                           | MTTC01001044.1  | 93,247                | 428                                           |
|                           | MTTC01000698.1* | 44,750                | 292                                           |
|                           | MTTC01000455.1  | 32,409                | 180                                           |
|                           | MTTC01000722.1  | 44,489                | 229                                           |
|                           | MTTC01000425.1  | 48,635                | 172                                           |
|                           | MTTC01000872.1  | 59,640                | 162                                           |
|                           | MTTC01000440.1  | 155,132               | 319                                           |
|                           | MTTC01000910.1  | 164,193               | 138                                           |

\* Contigs containing only CTR sequences
